# Supplementary material
Source: PubMed Central journal article supplement (PMC2727141)

Vlasi\_Supplementay\_Figure 1

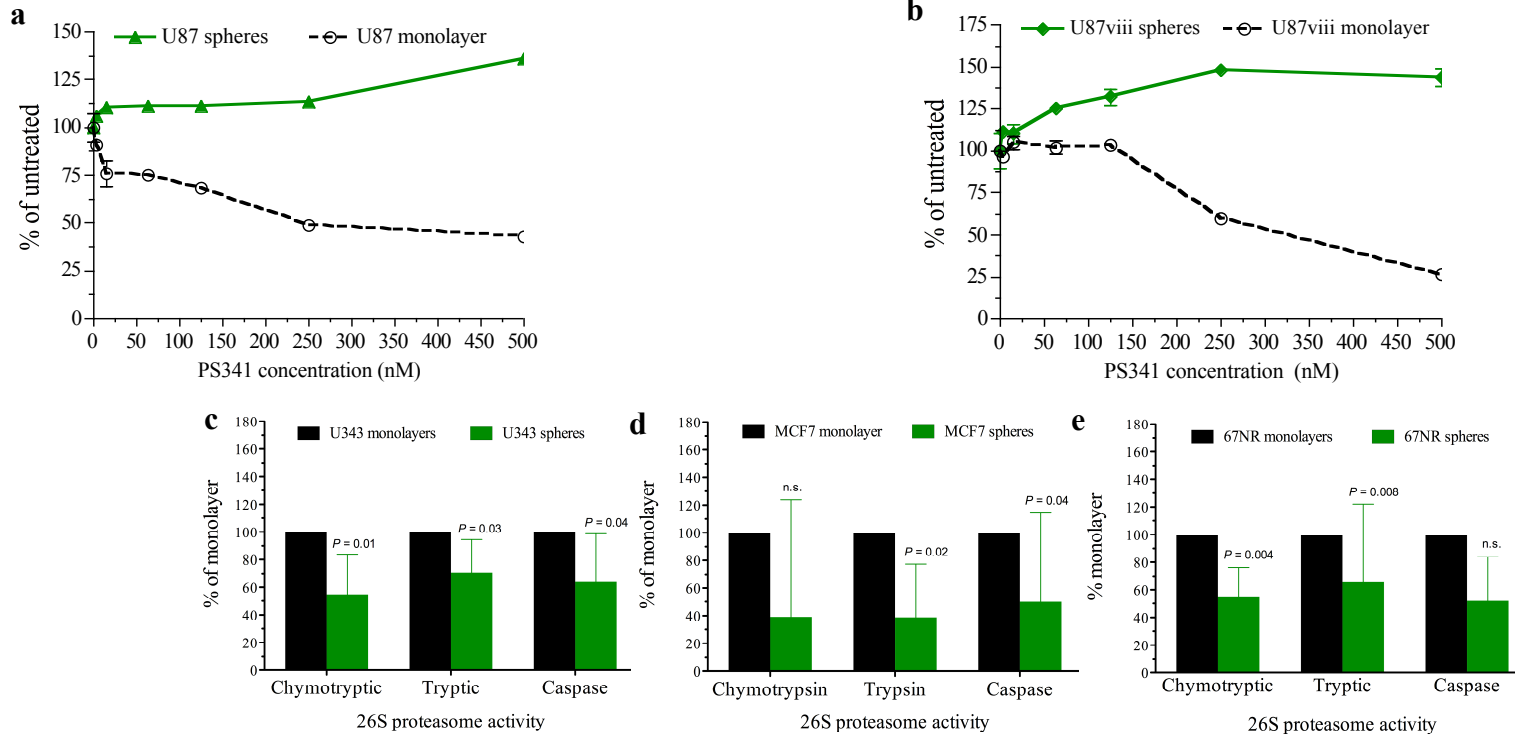

Supplement: djn509_1.pdf [file djn509_1.pdf]

Vlashi\_Supplementary Figure 2

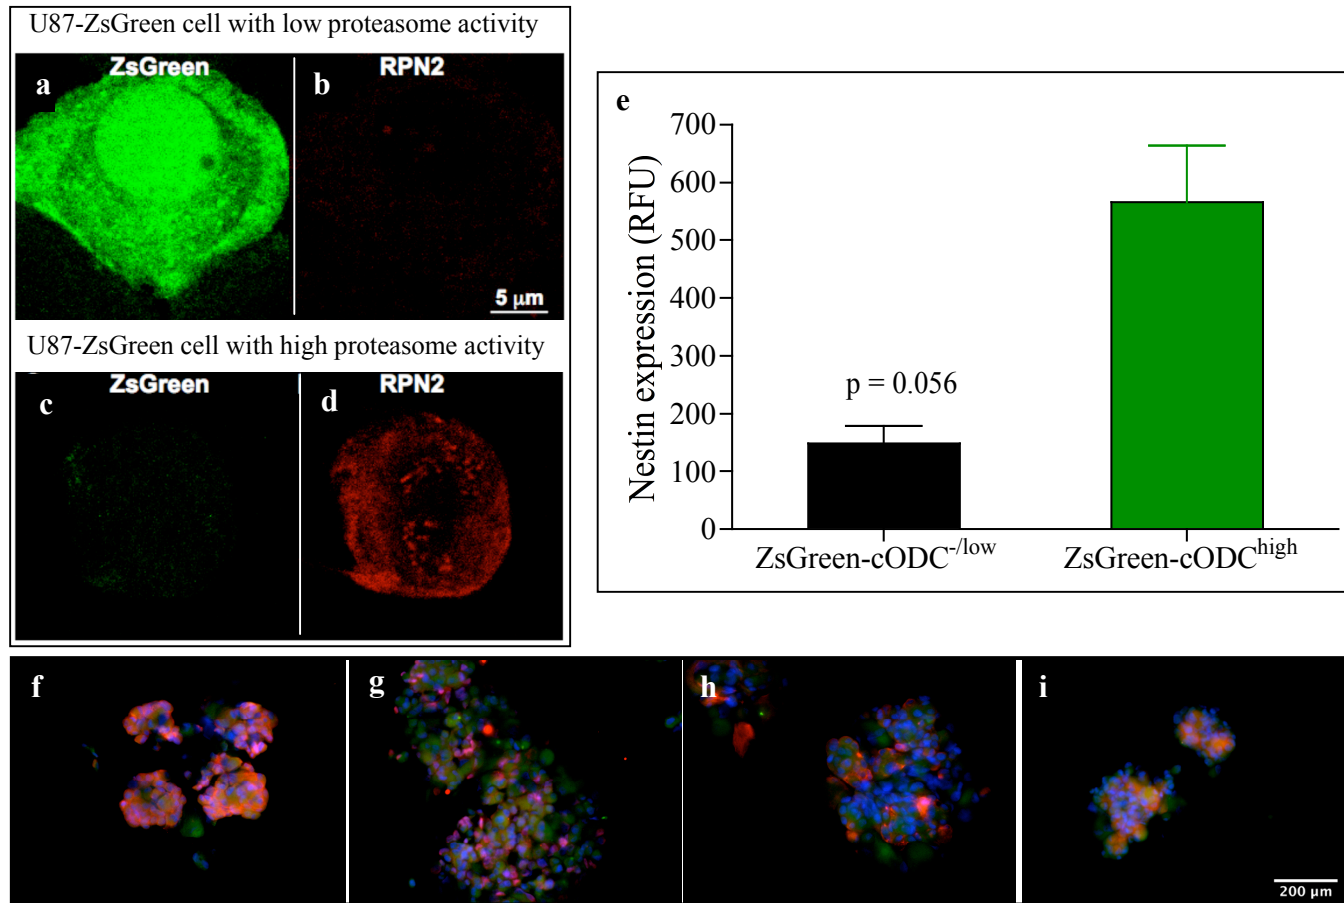

Supplement: djn509_2.pdf [file djn509_2.pdf]

Vlasi\_Supplementary Figure 3

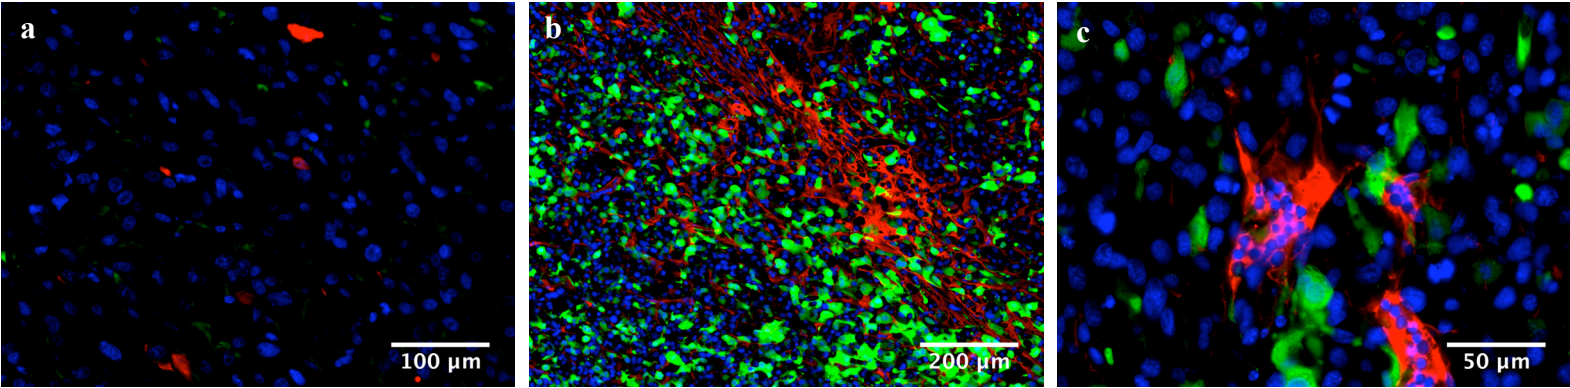

Supplement: djn509_3.pdf [file djn509_3.pdf]

Vlashi\_Supplementary Figure 4

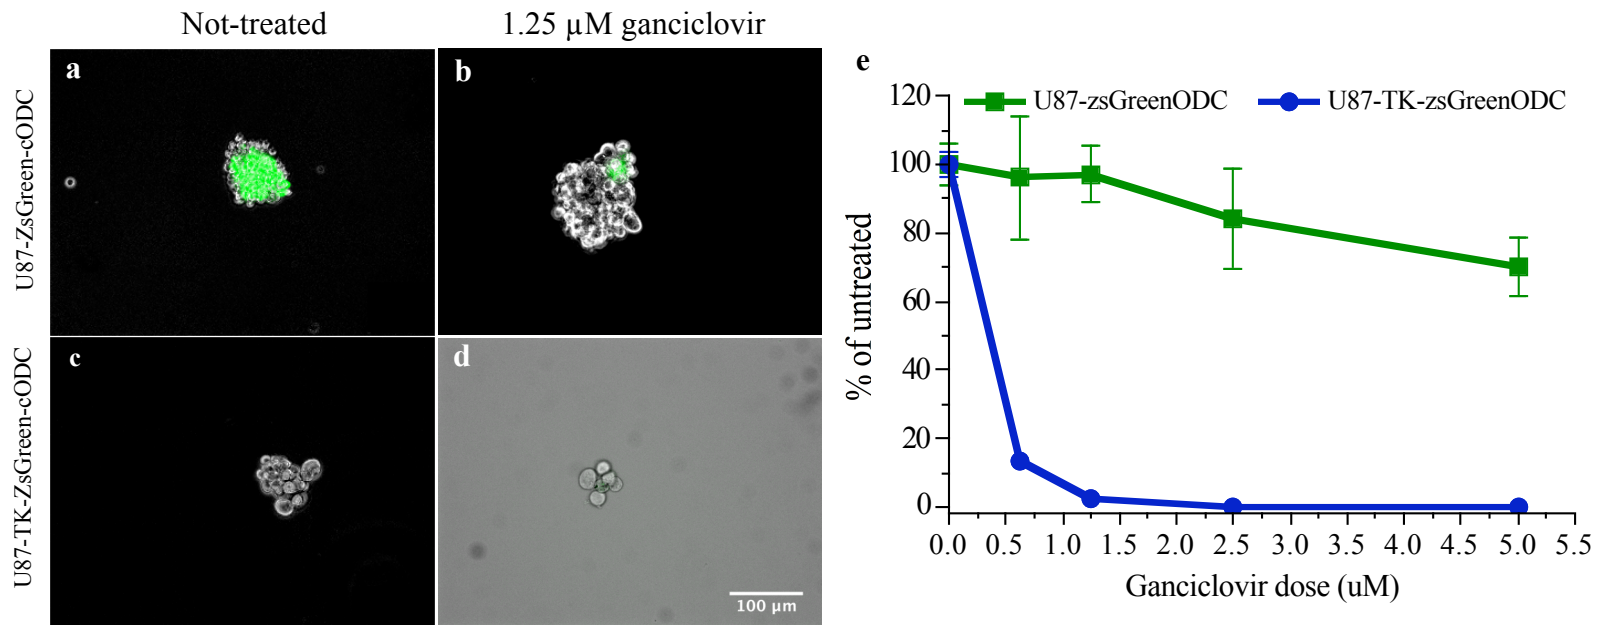

Supplement: djn509_4.pdf [file djn509_4.pdf]
